# Supplementary material
Source: PubMed Central journal article supplement (PMC5796640)
Supplement: NIHMS75944-supplement-Appendix_Table_1.pdf [file NIHMS75944-supplement-Appendix_Table_1.pdf]

| Authors                          | Year | Sample                        | Resistance criteria                                                                                                                                                                                       | Modality                              | Medication at time of scan                              | Diagnostic Criteria |
|----------------------------------|------|-------------------------------|-----------------------------------------------------------------------------------------------------------------------------------------------------------------------------------------------------------|---------------------------------------|---------------------------------------------------------|---------------------|
| Ahmed et al. <sup>1</sup>        | 2015 | 33 TR, 31 HC                  | Failed $\geq 2$ Aps ( $\geq 1$ atypical). Prolonged positive or negative symptoms of $\geq$ moderate severity                                                                                             | MRI – Structural                      | Pre and post clozapine                                  | DSM-IV-TR           |
| Alonso-Solis et al. <sup>2</sup> | 2015 | 19 TR-AVH, 14 R, 20 HC        | Daily AVH AND failed $\geq 2$ Aps (at dose equiv $\geq 600$ mg clozapine/day)                                                                                                                             | fMRI – resting state                  | Typical/Atypical Aps                                    | DSM-IV-TR           |
| Anderson et al. <sup>3</sup>     | 2015 | 15 CNR, 19 TR, 18 R, 20 HC    | Lack of significant response despite trials (adequate dose and $\geq 6$ wk duration) of $\geq 2$ Aps                                                                                                      | MRI- structural                       | Atypical Aps (including clozapine)                      | DSM-IV-TR           |
| Arango et al. <sup>4</sup>       | 2003 | 45 TR                         | Residual positive ( $\geq 8$ BPRS psychotic) or negative symptoms ( $\geq 20$ SANS) despite $\geq 2$ 6wk AP trials. Prospective trial fluphenazine 20mg/day – subjects with $>30\%$ improvement excluded. | MRI – Structural                      | Clozapine or Haloperidol                                | DSM-III-R           |
| Bartlett et al. <sup>5</sup>     | 1998 | 7 TR, 7 R                     | Unmedicated BPRS $\geq 50$ or medicated BPRS $\geq 42$ AND no worsening when unmedicated. Prospective 4-wk AP trial for patients with no records                                                          | FDG-PET (haloperidol challenge)       | Not specified                                           | DSM-III-R           |
| Buchsbaum et al. <sup>6</sup>    | 1992 | 12 Scz                        | Not specified                                                                                                                                                                                             | FDG-PET                               | Pre/post clozapine/thioxene                             | Not specified       |
| Cachia et al. <sup>7</sup>       | 2008 | 30 TR-AVH, 28 HC              | Kane et al (1988)                                                                                                                                                                                         | MRI-Structural                        | Typical /atypical Aps                                   | DSM-IV              |
| Chakos et al. <sup>8</sup>       | 1995 | 8 clozapine, 7 typical Aps    | Not specified                                                                                                                                                                                             | MRI- Structural                       | Clozapine and typical Aps                               | Not specified       |
| Demjaha et al. <sup>9</sup>      | 2012 | 12 TR, 12 R, 12 HC            | Conley et al (2001)                                                                                                                                                                                       | FDOPA-PET                             | Non clozapine Aps                                       | DSM-IV              |
| Demjaha et al. <sup>10</sup>     | 2014 | 6 TR, 8 R, 10 HC              | Conley et al (2001)                                                                                                                                                                                       | 1H-MRS                                | Typical and atypical Aps                                | DSM-IV              |
| Ergun et al. <sup>11</sup>       | 2010 | 20 TR                         | Treatment refractory or AP intolerant                                                                                                                                                                     | <sup>99m</sup> Tc-HMPAO SPECT         | Pre and post clozapine                                  | DSM-IV              |
| Ertugrul et al. <sup>12</sup>    | 2009 | 22 TR                         | On clozapine due to treatment resistance or intolerance to previous Aps                                                                                                                                   | <sup>99m</sup> Tc-HMPAO SPECT/ 1H-MRS | Typical and atypical Aps                                | DSM-IV              |
| Fitzgerald et al. <sup>13</sup>  | 2007 | 3 TR, 4HC                     | Persistent severe refractory hallucinations that had not responded to $\geq 2$ adequate courses of Aps                                                                                                    | fMRI (word generation task)           | Clozapine, amisulpride, sertraline, valproate, diazepam | Not specified       |
| Friedman et al. <sup>14</sup>    | 1991 | 34 TR                         | Failure to respond to $\geq 2$ different class Aps (each for $\geq 6$ weeks, $\geq 800$ mg CPZ equiv). $\geq 4$ on BPRS positive items                                                                    | CT Scan                               | Clozapine                                               | RDC                 |
| Galletly et al. <sup>15</sup>    | 2005 | 15 TR, 14 HC                  | Not specified                                                                                                                                                                                             | EEG                                   | Pre and post clozapine                                  | DSM-IV              |
| Goldstein et al. <sup>16</sup>   | 2015 | 11 CNR, 16 TR, 15 R, 11 HC    | NICE (2002), RANZCP (2005)                                                                                                                                                                                | 1H-MRS                                | Atypical Aps including clozapine                        | DSM-IV              |
| Gross et al. <sup>17</sup>       | 2004 | 16 TR                         | Kane et al (1988)                                                                                                                                                                                         | EEG                                   | Risperidone or olanzapine                               | SCID + chart review |
| Holleran et al. <sup>18</sup>    | 2014 | 19 TR, 19 HC                  | Failure to respond to $\geq 2$ Aps ( $\geq 1$ atypical), prolonged moderate/severe positive or negative symptoms.                                                                                         | MRI- DTI                              | Atypical Aps, antidepressants                           | DSM-IV              |
| Honer et al. <sup>19</sup>       | 1995 | 42 TR (inc 3 Schizoaffective) | Poor response to adequate AP dose for $\geq 6$ months. May et al. (1988) scale.                                                                                                                           | CT scan                               | Antipsychotic class not specified                       | DSM-III-R           |
| Hoptman et al. <sup>20</sup>     | 2005 | 49 TR                         | Kane et al (1988)                                                                                                                                                                                         | MRI-Structural                        | Typical and atypical Aps (including clozapine)          | SCID + chart review |
| Horton et al. <sup>21</sup>      | 2011 | 21 TR, 19 HC                  | Not specified                                                                                                                                                                                             | EEG                                   | Clozapine                                               | DSM-IV and SCID     |
| Kikuchi et al. <sup>22</sup>     | 2014 | 26 TR                         | Poor tolerance or poor response despite $\geq 2$ Aps ( $\geq 1$ atypical), $\geq 4$ weeks and $\geq 600$ mg CPZ equiv.                                                                                    | EEG                                   | Pre and post clozapine treatment                        | Not specified       |
| Klirova et al. <sup>23</sup>     | 2013 | 15 TR-AVH, 19HC               | Non response to both typical and atypical Aps + $\geq 5$ episodes AVH per day in the last month                                                                                                           | FDG PET                               | Aps, Antidepressants, anticonvulsants                   | DSM-IV              |
| Knott et al. <sup>24</sup>       | 2001 | 17 TR, 17 HC                  | Kane et al (1988)                                                                                                                                                                                         | EEG                                   | Not specified                                           | DSM-III-R           |
| Knott et al. <sup>25</sup>       | 2002 | 17 TR                         | Kane et al (1988)                                                                                                                                                                                         | EEG                                   | Pre/post clozapine                                      | DSM-III-R           |
| Konicki et al. <sup>26</sup>     | 2001 | TR 26                         | Kane et al (1988)                                                                                                                                                                                         | CT scan                               | clozapine                                               | DSM-III-R           |
| Kubera et al. <sup>27</sup>      | 2014 | 10 TR-AVH, 10 nAVH, 14 HC     | Persistent AVH despite $\geq 2$ AP trials (adequate dose, $\geq 6$ wks)                                                                                                                                   | MRI Structural                        | Clozapine and other Aps                                 | DSM-IV              |
| Lacroix et al. <sup>28</sup>     | 1995 | 10 TR, 10 NR                  | 35% or more and a 30% or less reduction, respectively, on the Brief Psychiatric Rating Scale (BPRS)                                                                                                       | EEG                                   | Not specified                                           | DSM-IV              |

|                                  |            |                                                   |                                                                                                                                                          |                               |                                                              |               |
|----------------------------------|------------|---------------------------------------------------|----------------------------------------------------------------------------------------------------------------------------------------------------------|-------------------------------|--------------------------------------------------------------|---------------|
| Lahti et al. <sup>29,30</sup>    | 2003, 2004 | 6 partially responsive, 10 HV                     | Not specified                                                                                                                                            | <sup>15</sup> O-PET           | Pre/post clozapine                                           | DSM-III-R     |
| Lauriello et al. <sup>31</sup>   | 1998       | 21 TR                                             | Treatment intolerant or inadequate response.                                                                                                             | MRI-Structural                | Typical Aps                                                  | DSM-III-R     |
| Lawrie et al. <sup>32</sup>      | 1995       | 20 TR, 20 R                                       | May et al (1988)                                                                                                                                         | MRI-Structural/<br>SPECT      | Not specified                                                | DSM-IV        |
| Lee et al. <sup>33,34</sup>      | 2006, 2008 | 25 TR-AVH, 23 nAVH                                | Persistent AVH for ≥2yrs                                                                                                                                 | EEG                           | Conventional neuroleptics                                    | DSM-IV        |
| Maller et al. <sup>35</sup>      | 2012       | 52 TR, 182 MDD, 76 HC                             | Not specified                                                                                                                                            | MRI-Structural                | Not specified                                                | DSM-IV        |
| MacCrimmon et al. <sup>36</sup>  | 2012       | 64 TR                                             | Kane et al (1988)                                                                                                                                        | EEG                           | Pre/post clozapine, (+ other psychotropics)                  | DSM-IV        |
| Milovan et al. <sup>37</sup>     | 2004       | 13TR, 13 HC                                       | Kane et al (1988)                                                                                                                                        | EEG                           | Not specified                                                | DSM-IV        |
| Mitelman et al. <sup>38</sup>    | 2005       | 13 TR, 24 R, 27 HC                                | Keefe et al (1987)                                                                                                                                       | MRI-Structural                | Not specified                                                | DSM-IV        |
| Molina et al. <sup>39</sup>      | 1996       | 24 TR                                             | Lack of adequate response to ≥2 chemically different Aps, ≥800mg CPZ equiv                                                                               | <sup>99m</sup> Tc-HMPAO SPECT | Pre/post clozapine                                           | DSM-IV        |
| Molina et al. <sup>40</sup>      | 1997a      | 36 TR, 28 HC                                      | Kane et al (1988)                                                                                                                                        | <sup>99m</sup> Tc-HMPAO SPECT | Not specified                                                | DSM-IV-R      |
| Molina et al. <sup>41</sup>      | 1997 b     | 39 TR (includes Molina et al. 1996 sample), 28 HC | Lack of response to ≥2 dissimilar Aps (≥800mg CPZ equiv), each one for ≥2 months over last year.                                                         | <sup>99m</sup> Tc-HMPAO SPECT | Pre/post clozapine                                           | DSM-IV        |
| Molina et al. <sup>42</sup>      | 2003       | 25 TR                                             | Lack of response to ≥2 different Aps for ≥6 weeks in past 12 mths, dose ≥800mg CPZ equiv. Significant positive or disorganisation residual symptoms      | MRI-structural<br>FDG PET     | Pre/post clozapine                                           | DSM-III-R     |
| Molina et al. <sup>43,44</sup>   | 2005, 2007 | 23 TR, 17NN, 18HC                                 | Lack of adequate response to ≥2 Aps for ≥4 weeks in preceding 12 months, dose ≥800mg CPZ equiv. All had haloperidol for ≥4wks before scan                | FDG PET                       | Pre/post clozapine                                           | DSM-IV        |
| Molina et al. <sup>45</sup>      | 2008a      | 30 TR, 19 R and 44 HC                             | Kane et al (1988)                                                                                                                                        | MRI-structural, EEG           | Haloperidol prior to first MRI, then olanzapine or clozapine | DSM-IV        |
| Molina et al. <sup>46</sup>      | 2008b      | 10 TR, 10 HC                                      | A poor response during the previous year to haloperidol or risperidone followed by lack of response to 4 week trial of risperidone                       | <sup>99m</sup> Tc-HMPAO SPECT | Pre/post clozapine                                           | DSM-IV        |
| Potkin et al. <sup>47</sup>      | 1994       | 18 Scz                                            | Not specified                                                                                                                                            | FDG PET                       | Pre/post clozapine                                           | Not specified |
| Potkin et al. <sup>48</sup>      | 2003       | 15 TR                                             | Not specified                                                                                                                                            | FDG PET                       | Not specified                                                | DSM-IV        |
| Quarantelli et al. <sup>49</sup> | 2014       | 20 (TR + CNR), 15 R, 16 HC                        | <20 % improvement AND total > 45 on BPRS AND ≥4 in ≥2 BPRS psychotic items AND ≥2 yrs poor functioning despite 6-8 weeks with ≥2 Aps and good adherence. | MRI –structural               | Typical and atypical Aps (including clozapine)               | DSM-IV-TR     |
| Ramos et al. <sup>50</sup>       | 2001       | 10 TR, 10 R                                       | Keefe et al (1990) and Brenner & Merlo (1995) criteria                                                                                                   | EEG                           | Not specified                                                | DSM-IV        |
| Ravan et al. <sup>51</sup>       | 2015       | 47 TR, 66 HC                                      | Kane et al (1988) criteria                                                                                                                               | EEG (auditory evoked)         | Pre/Post clozapine                                           | DSM-IV        |
| Scheepers et al. <sup>52</sup>   | 2001a      | 26 TR                                             | No response (CGI≥4) to ≥1 typical AP for ≥ 4 weeks OR severe EPSEs or TD                                                                                 | MRI-Structural                | Pre/post clozapine                                           | DSM-IV        |
| Scheepers et al. <sup>53</sup>   | 2001 b     | 28 TR                                             | No response (CGI≥4) to ≥1 typical AP for ≥ 4 weeks OR severe EPSEs or TD                                                                                 | MRI-Structural                | Pre/post clozapine                                           | DSM-IV        |
| Sun et al. <sup>54</sup>         | 2009       | 42 TR, 42 MDD, 30 HC                              | Kane et al (1988) criteria                                                                                                                               | MRI-Structural                | Clozapine                                                    | DSM-III-R     |
| Tsekou et al. <sup>55</sup>      | 2015       | 7 TR                                              | Bremner et al (1990) criteria AND ≥70 on PANSS, and schizophrenia diagnosis for ≥2 years                                                                 | Sleep EEG                     | Pre/post clozapine                                           | DSM-III-R     |
| Umbricht et al. <sup>56</sup>    | 1998       | 11 TR, 6 R, 13 HC                                 | Partially refractory –≥4 on any of the 4 BPRS positive symptom items                                                                                     | EEG                           | Clozapine and haloperidol                                    | DSM-III-R     |
| Vercammen et al. <sup>57</sup>   | 2010       | 27 TR-AVH, 27 HC                                  | Daily AVH, ≥2 adequate AP trials                                                                                                                         | MRI-Resting state             | Aps and benzodiazepines                                      | DSM-IV        |
| Wolf et al. <sup>58,59</sup>     | 2011, 2012 | 10 TR-AVH, 10 R, 14 HC                            | Kane et al (1988)                                                                                                                                        | MRI-Resting state             | Clozapine                                                    | DSM-IV        |
| Zhao et al. <sup>60</sup>        | 2006       | 21 TR, 40 HC                                      | Andreason's negative symptom profile                                                                                                                     | SPECT                         | Medication free, follow up on clozapine                      | DSM-IV        |
| Zugman et al. <sup>61</sup>      | 2013       | 61 TR, 67 R, 80 HC                                | Kane et al (1988)                                                                                                                                        | MRI-Structural                | Typical and atypical Aps (including clozapine)               | DSM-IV        |

**Table 1: Study characteristics**

1H-MRS – proton magnetic resonance spectroscopy; AP –antipsychotic; AVH – Auditory verbal hallucinations; BPRS – Brief Psychiatric Rating Scale; CNR – clozapine non responder; CPZ equiv – Chlorpromazine equivalents; DSM – Diagnostic and Statistical Manual of Mental Disorders; EEG – electroencephalogram; HC- healthy controls; MDD – major depressive disorder; MRI – Magnetic Resonance Imaging; PET – Positron Emission Tomography; Individuals with schizophrenia without auditory hallucinations; R – antipsychotic responders; Scz- unspecified whether responder/resistant; SPECT- Single-photon emission computed tomography

- 1 Ahmed M, Cannon DM, Scanlon C, *et al.* Progressive Brain Atrophy and Cortical Thinning in Schizophrenia after Commencing Clozapine Treatment. *Neuropsychopharmacology* 2015; published online April. DOI:10.1038/npp.2015.90.
- 2 Alonso-Solis A, Vives-Gilabert Y, Grasa E, *et al.* Resting-state functional connectivity alterations in the default network of schizophrenia patients with persistent auditory verbal hallucinations. *Schizophr Res* 2015; **161**: 261–8.
- 3 Anderson VM, Goldstein ME, Kydd RR, Russell BR. Extensive Gray Matter Volume Reduction in Treatment-Resistant Schizophrenia. *Int J Neuropsychopharmacol* 2015; published online Feb. DOI:10.1093/ijnp/pyv016.
- 4 Arango C, Breier A, McMahon R, Carpenter WT, Buchanan RW. The relationship of clozapine and haloperidol treatment response to prefrontal, hippocampal, and caudate brain volumes. *Am J Psychiatry* 2003; **160**: 1421–7.
- 5 Bartlett EJ, Brodie JD, Simkowitz P, *et al.* Effect of a Haloperidol Challenge on Regional Brain Metabolism in Neuroleptic-Responsive and Nonresponsive Schizophrenic Patients. *Am J Psychiatry* 1998; **155**: 337–43.
- 6 Buchsbaum, Buchsbaum MS, Potkin SG, *et al.* Effects of clozapine and thiothixene on glucose metabolic rate in schizophrenia. *Neuropsychopharmacology* 1992; **6**: 155–63.
- 7 Cachia A, Paillère-Martinot ML, Galinowski A, *et al.* Cortical folding abnormalities in schizophrenia patients with resistant auditory hallucinations. *Neuroimage* 2008; **39**: 927–35.
- 8 Chakos MH, Lieberman J a, Alvir J, Bilder R, Ashtari M. Caudate nuclei volumes in schizophrenic patients treated with typical antipsychotics or clozapine. *Lancet* 1995; **345**: 456–7.
- 9 Demjaha A, Murray RM, McGuire PK, Kapur S, Howes OD. Dopamine synthesis capacity in patients with treatment-resistant schizophrenia. *Am J Psychiatry* 2012; **169**: 1203–10.
- 10 Demjaha A, Egerton A, Murray RM, *et al.* Antipsychotic treatment resistance in schizophrenia associated with elevated glutamate levels but normal dopamine function. *Biol Psychiatry* 2014; **75**: e11–3.
- 11 Ergün EL, Volkan-Salanci B, Ertugrul A, Demir B, Erbas B. Evaluation of SISCOm in routine regional cerebral blood flow alterations after clozapine, in schizophrenia. *Hell J Nucl Med* 2010; **13**: 35–9.
- 12 Ertugrul A, Volkan-Salanci B, Basar K, *et al.* The effect of clozapine on regional cerebral blood flow and brain metabolite ratios in schizophrenia: relationship with treatment response. *Psychiatry Res* 2009; **174**: 121–9.
- 13 Fitzgerald PB, Sriharan A, Benitez J, *et al.* A preliminary fMRI study of the effects on cortical activation of the treatment of refractory auditory hallucinations with rTMS. *Psychiatry Res - Neuroimaging* 2007; **155**: 83–8.
- 14 Friedman L, Knutson L, Shurell M, Meltzer HY. Prefrontal sulcal prominence is inversely related to response to clozapine in schizophrenia. *Biol Psychiatry* 1991; **29**: 865–77.
- 15 Galletly C a., Clark CR, McFarlane AC. Clozapine improves working memory updating in schizophrenia. *Eur Neuropsychopharmacol* 2005; **15**: 601–8.
- 16 Goldstein ME, Anderson VM, Pillai A, Kydd RR, Russell BR. Glutamatergic neurometabolites in clozapine-responsive and -resistant schizophrenia. *Int J Neuropsychopharmacol* 2015; **18**. DOI:10.1093/ijnp/pyu117.
- 17 Gross A, Joutsiniemi SL, Rimon R, Appelberg B. Clozapine-induced QEEG changes correlate with clinical response in schizophrenic patients: A prospective, longitudinal study. *Pharmacopsychiatry* 2004; **37**: 119–22.
- 18 Holleran L, Ahmed M, Schmidt H, *et al.* Altered Interhemispheric and Temporal Lobe White Matter Microstructural Organisation in Severe Chronic Schizophrenia. *Neuropsychopharmacology* 2014; **39**: 944–54.
- 19 Honer WG, Smith GN, Lapointe JS, Macewan GW, Kopala L, Altman S. Regional cortical anatomy and clozapine response in refractory schizophrenia. *Neuropsychopharmacology* 1995; **13**: 85–7.
- 20 Hoptman MJ, Volavka J, Weiss EM, *et al.* Quantitative MRI measures of orbitofrontal cortex in patients with chronic schizophrenia or schizoaffective disorder. *Psychiatry Res - Neuroimaging* 2005; **140**: 133–45.
- 21 Horton J, Millar A, Labelle A, Knott VJ. MMN responsivity to manipulations of frequency and duration deviants in chronic, clozapine-treated schizophrenia patients. *Schizophr Res* 2011; **126**: 202–11.
- 22 Kikuchi YS, Sato W, Ataka K, *et al.* Clozapine-induced seizures, electroencephalography abnormalities, and clinical responses in Japanese patients with schizophrenia. *Neuropsychiatr Dis Treat* 2014; **10**: 1973–8.
- 23 Klirova M, Horacek J, Novak T, *et al.* Individualized rTMS neuronavigated according to regional brain metabolism (18FDG PET) has better treatment effects on auditory hallucinations than standard positioning of rTMS: A double-blind, sham-controlled study. *Eur Arch Psychiatry Clin Neurosci* 2013; **263**: 475–84.
- 24 Knott V, Labelle a., Jones B, Mahoney C. Quantitative EEG in schizophrenia and in response to acute and chronic clozapine treatment. *Schizophr Res* 2001; **50**: 41–53.
- 25 Knott VJ, LaBelle A, Jones B, Mahoney C. EEG coherence following acute and chronic clozapine in treatment-resistant schizophrenics. *Exp Clin Psychopharmacol* 2002; **10**: 435–44.
- 26 Konicki PE, Kwon KY, Steele V, *et al.* Prefrontal cortical sulcal widening associated with poor treatment response to clozapine. *Schizophr Res* 2001; **48**: 173–6.
- 27 Kubera KM, Sambataro F, Vasic N, *et al.* Source-based morphometry of gray matter volume in patients with schizophrenia who have persistent auditory verbal hallucinations. *Prog Neuro-Psychopharmacology Biol Psychiatry* 2014; **50**: 102–9.
- 28 Lacroix D, Chaput Y, Rodriguez JP, *et al.* Quantified EEG changes associated with a positive clinical response to clozapine in schizophrenia. *Prog Neuro-Psychopharmacology Biol Psychiatry* 1995; **19**: 861–76.
- 29 Lahti AC, Holcomb HH, Weiler M a, *et al.* Clozapine but not haloperidol Re-establishes normal task-activated rCBF patterns in schizophrenia within the anterior cingulate cortex. *Neuropsychopharmacology* 2004; **29**: 171–8.
- 30 Lahti AC, Holcomb HH, Weiler M a., Medoff DR, Tamminga C a. Functional effects of antipsychotic drugs: Comparing clozapine with haloperidol. *Biol Psychiatry* 2003; **53**: 601–8.
- 31 Lauriello J, Mathalon DH, Rosenbloom M, *et al.* Association between regional brain volumes and clozapine response in schizophrenia. *Biol Psychiatry* 1998; **43**: 879–86.
- 32 Lawrie SM, Ingle GT, Santosh CG, *et al.* Magnetic resonance imaging and single photon emission tomography in treatment-responsive and treatment-resistant schizophrenia. *Br J Psychiatry* 1995; **167**: 202–10.
- 33 Lee S-H, Wynn JK, Green MF, *et al.* Quantitative EEG and low resolution electromagnetic tomography (LORETA) imaging of patients with persistent auditory hallucinations. *Schizophr Res* 2006; **83**: 111–9.
- 34 Lee S-H, Choo J-S, Im W-Y, Chae J-H. Nonlinear analysis of electroencephalogram in schizophrenia patients with persistent auditory hallucination. *Psychiatry Investig* 2008; **5**: 115–20.

- 35 Maller JJ, Daskalakis ZJ, Thomson RHS, Daigle M, Barr MS, Fitzgerald PB. Hippocampal volumetrics in treatment-resistant depression and schizophrenia: The devil's in De-Tail. *Hippocampus* 2012; **22**: 9–16.
- 36 MacCrimmon D, Brunet D, Criollo M, Galin H, Lawson JS. Clozapine Augments Delta, Theta, and Right Frontal EEG Alpha Power in Schizophrenic Patients. *ISRN Psychiatry* 2012; **2012**: 1–8.
- 37 Milovan DL, Baribeau J, Roth RM, Stip E. ERP study of pre-attentive auditory processing in treatment-refractory schizophrenia. *Brain Cogn* 2004; **55**: 355–7.
- 38 Mitelman S a., Shihabuddin L, Brickman AM, Hazlett E a., Buchsbaum MS. Volume of the cingulate and outcome in schizophrenia. *Schizophr Res* 2005; **72**: 91–108.
- 39 Molina Rodríguez V, Andréé RM, Jesús Pérez Castejón M, Capdevila García E, Carreras Delgado JL, Rubia Vila J. SPECT study of regional cerebral perfusion in neuroleptic-resistant schizophrenic patients who responded or did not respond to clozapine. *Am J Psychiatry* 1996; **153**: 1343–6.
- 40 Molina Rodríguez V, Montz Andréé R, Pérez Castejón MJ, et al. Cerebral perfusion correlates of negative symptomatology and parkinsonism in a sample of treatment-refractory schizophrenics: An exploratory 99mTc-HMPAO SPET study. *Schizophr Res* 1997; **25**: 11–20.
- 41 Rodríguez VM, Andréé RM, Pérez Castejón MJ, et al. Fronto-striato-thalamic perfusion and clozapine response in treatment- refractory schizophrenic patients. A 99mTc-HMPAO study. *Psychiatry Res - Neuroimaging* 1997; **76**: 51–61.
- 42 Molina V, Reig S, Sarramea F, et al. Anatomical and functional brain variables associated with clozapine response in treatment-resistant schizophrenia. *Psychiatry Res* 2003; **124**: 153–61.
- 43 Molina V, Gispert JD, Reig S, et al. Cerebral metabolic changes induced by clozapine in schizophrenia and related to clinical improvement. *Psychopharmacology (Berl)* 2005; **178**: 17–26.
- 44 Molina V, Sanz J, Sarramea F, Palomo T. Marked hypofrontality in clozapine-responsive patients. *Pharmacopsychiatry* 2007; **40**: 157–62.
- 45 Molina V, Reig S, Sanz J, et al. Differential clinical, structural and P300 parameters in schizophrenia patients resistant to conventional neuroleptics. *Prog Neuro-Psychopharmacology Biol Psychiatry* 2008; **32**: 257–66.
- 46 Molina V, Tamayo P, Montes C, et al. Clozapine may partially compensate for task-related brain perfusion abnormalities in risperidone-resistant schizophrenia patients. *Prog Neuropsychopharmacol Biol Psychiatry* 2008; **32**: 948–54.
- 47 Potkin SG, Buchsbaum MS, Jin Y, et al. Clozapine effects of glucose metabolic rate in striatum and frontal cortex. *J Clin Psychiatry* 1994; **55**: 63–6.
- 48 Potkin SG, Basile VS, Jin Y, et al. D1 receptor alleles predict PET metabolic correlates of clinical response to clozapine. *Mol Psychiatry* 2003; **8**: 109–13.
- 49 Quarantelli M, Palladino O, Prinster A, et al. Patients with poor response to antipsychotics have a more severe pattern of frontal atrophy: a voxel-based morphometry study of treatment resistance in schizophrenia. *Biomed Res Int* 2014; **2014**: 325052.
- 50 Ramos J, Cerdán LF, Guevara MA, Amezcua C, Sanz A. Abnormal EEG patterns in treatment-resistant schizophrenic patients. *Int J Neurosci* 2001; **109**: 47–59.
- 51 Ravan M, Hasey G, Reilly JP, MacCrimmon D, Khodayari-Rostamabad A. A machine learning approach using auditory odd-ball responses to investigate the effect of Clozapine therapy. *Clin Neurophysiol* 2015; **126**: 721–30.
- 52 Scheepers FE, De Wied CCG, Pol HEH, Van De Flier W, Van Der Linden J a., Kahn RS. The effect of clozapine on caudate nucleus volume in schizophrenic patients previously treated with typical antipsychotics. *Neuropsychopharmacology* 2001; **24**: 47–54.
- 53 Scheepers FE, Gispert de Wied CC, Hulshoff Pol HE, Kahn RS. Effect of clozapine on caudate nucleus volume in relation to symptoms of schizophrenia. *Am J Psychiatry* 2001; **158**: 644–6.
- 54 Sun J, Maller JJ, Daskalakis ZJ, Furtado CC, Fitzgerald PB. Morphology of the corpus callosum in treatment-resistant schizophrenia and major depression. *Acta Psychiatr Scand* 2009; **120**: 265–73.
- 55 Tsekou H, Angelopoulos E, Paparrigopoulos T, et al. Sleep EEG and spindle characteristics after combination treatment with clozapine in drug-resistant schizophrenia: a pilot study. *J Clin Neurophysiol* 2015; **32**: 159–63.
- 56 Umbricht D, Javitt D, Novak G, et al. Effects of clozapine on auditory event-related potentials in schizophrenia. *Biol Psychiatry* 1998; **44**: 716–25.
- 57 Vercammen A, Knegtering H, den Boer J a., Liemburg EJ, Aleman A. Auditory Hallucinations in Schizophrenia Are Associated with Reduced Functional Connectivity of the Temporo-Parietal Area. *Biol Psychiatry* 2010; **67**: 912–8.
- 58 Wolf ND, Sambataro F, Vasic N, et al. Dysconnectivity of multiple resting-state networks in patients with schizophrenia who have persistent auditory verbal hallucinations. *J Psychiatry Neurosci* 2011; **36**: 366–74.
- 59 Wolf ND, Grön G, Sambataro F, et al. Magnetic resonance perfusion imaging of auditory verbal hallucinations in patients with schizophrenia. *Schizophr Res* 2012; **134**: 285–7.
- 60 Zhao J, He X, Liu Z, Yang D. The effects of clozapine on cognitive function and regional cerebral blood flow in the negative symptom profile schizophrenia. *Int J Psychiatry Med* 2006; **36**: 171–81.
- 61 Zugman A, Gadelha A, Assunção I, et al. Reduced dorso-lateral prefrontal cortex in treatment resistant schizophrenia. *Schizophr Res* 2013; **148**: 81–6.
